# Supplementary material for: GPx2 Suppression of H2O2 Stress Links the Formation of Differentiated Tumor Mass to Metastatic Capacity in Colorectal Cancer
Source: Oxford University Press journal article supplement (doi:10.1158/0008-5472.can-14-1645), 2014-09-26
Supplement: 00085472can141645-sup-132653_1_supp_2608522_n37qhp.xlsx [file 00085472can141645-sup-132653_1_supp_2608522_n37qhp.xlsx]

## Sheet: Dataset 2
Supplementary Table S3
GPx2 co-expression signature
ACSL5	LY75
ASCL2	MUC3B
ATP10B	NEBL
ATP1A1	NOX1
AXIN2	PDHA1
BCL11B	PLS1
CD24	PPA1
CDCA7	REPIN1
CDH1	RNF114
CDH17	RNF128
CEACAM1	RNF43
CEACAM5	SLC5A1
CFTR	STRBP
CLDN3	TOX3
CLRN3	TPRN
DDC	TSPAN6
EHF	TSPAN8
EPB41L4B	TST
EPCAM	UCHL3
EPHB2	USH1C
ESRP1	VDAC1
ESRRA	VIL1
FAM3D	ZDHHC9
FERMT1
FGFR4
GJB1
GPX2
GUCY2C
HSD11B2
LGALS4
