# Supplementary material for: GPx2 Suppression of H2O2 Stress Links the Formation of Differentiated Tumor Mass to Metastatic Capacity in Colorectal Cancer
Source: Oxford University Press journal article supplement (doi:10.1158/0008-5472.can-14-1645), 2014-09-26
Supplement: 00085472can141645-sup-132653_1_supp_2608524_n87qgx.docx [file 00085472can141645-sup-132653_1_supp_2608524_n87qgx.docx]

**Supplementary Table S5. Primer pairs used for RT-qPCR analysis.**

| **Primers of genes** |  | **Sequences** |  |
| --- | --- | --- | --- |
|  | **Gene name** | **Forward** | **Reverse** |
|  | GPx2 | GCTCCCCTACCCTTATGATGA | AAATGATGAGCTTGGGATCGG |
| Stem cell | OLFM4 | ACTGTCCGAATTGACATCATGG | TTCTGAGCTTCCACCAAAACTC |
|  | SOX2 | TACAGCATGTCCTACTCGCAG | GAGGAAGAGGTAACCACAGGG |
|  | NANOG | TTTGTGGGCCTGAAGAAAACT | AGGGCTGTCCTGAATAAGCAG |
|  | OCT4 | CGACCATCTGCCGCTTTGAG | CCCCCTGTCCCCCATTCCTA |
|  | ASCL2 | TCTAAGGGCACAGAGAATCC | ACTGCTCGTGTCCAGATC |
|  | LGR5 | ACACTGTCATTGCGAGCCC | GAGGTCTAGGTAGGAGGTGAAG |
|  | ALDH1A1 | CCGTGGCGTACTATGGATGC | GCAGCAGACGATCTCTTTCGAT |
|  | EPHB2 | GCTTTCTGCTTACTGACTTAGG | GGTGGGAGGAGGGAAGAG |
|  | BMI1 | AGATTGGATCGGAAAGTAAAC | TCACAGTCATTGCTGCTGGGCA |
| Differentiation | FABP2 | ATGGCGTTTGACAGCACTTG | TCAGTTCCGTCTGCTAGATTGTA |
|  | CK20 | GGACGACACCCAGCGTTTAT | CGCTCCCATAGTTCACCGTG |
|  | MUC2 | GGAGATCACCAATGACTGCGA | GAATCGTTGTGGTCACCCTTG |
|  | ChrA | TAAAGGGGATACCGAGGTGATG | CCTCAGCCTTGGACTCCTG |
|  | CDX2 | GACGTGAGCATGTACCCTAGC | GCGTAGCCATTCCAGTCCT |
|  | DPP4 | TACAAAAGTGACATGCCTCAGTT | TGTGTAGAGTATAGAGGGGCAGA |
| Meschencymal | N-CADHERIN | TGGGAATCCGACGAATGG | TGCAGATCGGACCGGATACT |
|  | VIMENTIN | GGAAGCCGAAAACACCCTG | GAGACGCATTGTCAACATCCT |
|  | SNAIL1 | GAGGCGGTGGCAGACTAG | AGATGAGCATTGGCAGCGAG |
|  | TWIST1 | CGGGAGTCCGCAGTCTTA | TGAATCTTGCTCAGCTTGTC |
|  | ACTA2 | CAGGGCTGTTTTCCCATCCAT | ACGTAGCTGTCTTTTTGTCCC |
|  | FN1 | GGCTCACTGCAAAGACTTTGAA | GGCTCACTGCAAAGACTTTGAA |
|  | ZEB1 | CAAGAGGCGCAAACAAGCC | GGTTGGCAATACCGTCATCC |
| Proliferation | Ki67 | CGGACTTTGGGTGCGACTT | GTCGACCCCGCTCCTTTT |
| Housekeeping | HPRT | GAAAAGGACCCCACGAAGTGT | AGTCAAGGGCATATCCTACAA |
|  | RLP13A | GCCATCGTGGCTAAACAGGTA | GTTGGTGTTCATCCGCTTGC |
