# Supplementary material for: GPx2 Suppression of H2O2 Stress Links the Formation of Differentiated Tumor Mass to Metastatic Capacity in Colorectal Cancer
Source: Oxford University Press journal article supplement (doi:10.1158/0008-5472.can-14-1645), 2014-09-26
Supplement: 00085472can141645-sup-132653_1_supp_2608594_n57sdb.docx [file 00085472can141645-sup-132653_1_supp_2608594_n57sdb.docx]

| **Supplementary Table S2. Correlation of the expression of a H2O2-response metagene and H2O2-scavenging enzymes** | | | |
| --- | --- | --- | --- |
|  | **Datasets** | | |
| **Gene** | **De Sousa e Melo (90)** | **MVRM (345)** | **Marisa (566)** |
| **GPx1** | r=0.152 p=0.15 | r=0.359 p=6.0e-12 | r=0.222 p=9.7e-08 |
| **GPx2** | **r=-0.393 p=1.3e-04** | **r=-0.205 p=1.3e-04** | **r=-0.319 p=6.9e-15** |
| **GPx3** | r=0.494 p=7.3e-07 | r=0.244 p=4.4e-06 | r=0.325 p=2.1e-15 |
| **GPx4** | r=-0.023 p=0.83 | r=0.350 p=2.3e-11 | r=0.211 p=4.2e-07 |
| **GPx5** | r=0.151 p=0.16 | r=0.364 p=3.2e-12 | **r=-0.379 p=9.8e-21** |
| **GPx6/7** | r=0.349 p=7.4e-04 | r=0.364 p=3.2e-12 | r=0.348 p=1.3e-17 |
| **GPx8** | r=0.513 p=2.3e-07 | r=0.466 p=5.9e-20 | r=0.494 p=3.1e-36 |
| **PRDX1** | r=0.058 p=0.59 | r=0.409 p=2.6e-15 | r=0.177 p=2.2e-05 |
| **PRDX2** | r=-0.006 p=0.95 | r=0.247 p=3.3e-06 | r=0.105 p=0.01 |
| **PRDX3** | r=-0.042 p=0.70 | r=0.291 p=3.5e-08 | r=0.070 p=0.10 |
| **PRDX4** | r=-0.008 p=0.94 | r=0.234 p=1.1e-05 | r=0.085 p=0.04 |
| **PRDX5** | **r=-0.444 p=1.1e-05** | r=-0.078 p=0.15 | **r=-0.140 p=8.4e-04** |
| **PRDX6** | r=0.294 p=4.9e-03 | r=0.382 p=2.0e-13 | r=0.206 p=8.1e-07 |
| **Catalase** | **r=-0.334 p=1.3e-03** | r=0.128 p=0.02 | **r=-0.140 p=8.5e-04** |
